# Supplementary material for: Identification of different mechanisms leading to PAX6 down-regulation as potential events contributing to the onset of Hirschsprung disease
Source: PubMed Central journal article supplement (PMC4754768; doi:10.1038/srep21160), 2016-02-16
Supplement: srep21160-s1.pdf [file srep21160-s1.pdf]

**TITLE:** Identification of different mechanisms leading to *PAX6* down-regulation, as potential events contributing to the onset of Hirschsprung disease

**AUTHOR:** María Valle Enguix-Riego<sup>1,2,#</sup>, Ana Torroglosa<sup>1,2,#</sup>, Raquel María Fernández<sup>1,2</sup>,  
María José Moya-Jiménez<sup>3</sup>, Juan Carlos de Agustín<sup>4</sup>, Guillermo Antiñolo<sup>1,2</sup>, Salud Borrego<sup>1,2\*</sup>

# These authors contributed equally

**AUTHOR INSTITUTIONAL AFFILIATIONS:**

<sup>1</sup>Department of Genetics, Reproduction and Fetal Medicine. Institute of Biomedicine of Seville (IBIS), University Hospital Virgen del Rocío/CSIC/University of Seville, Seville, 41013, Spain.

<sup>2</sup> Centre for Biomedical Network Research on Rare Diseases (CIBERER), Seville, 41013, Spain.

<sup>3</sup>Department of Pediatric Surgery, University Hospital Virgen del Rocío, Seville, 41013, Spain.

<sup>4</sup>Department of Pediatric Surgery, General University Hospital Gregorio Marañón, Madrid, 28009, Spain.

**\*CORRESPONDING AUTHOR:**

Salud Borrego, MD, PhD.

Department of Genetics, Reproduction and Fetal Medicine.

University Hospital Virgen del Rocío.

Avda. Manuel Siurot s/n. 41013 Seville, Spain

Voice: + 34 955 012780, Fax: + 34 955 012779

e-mail: [salud.borrego.sspa@juntadeandalucia.es](mailto:salud.borrego.sspa@juntadeandalucia.es)

**Figure S1**

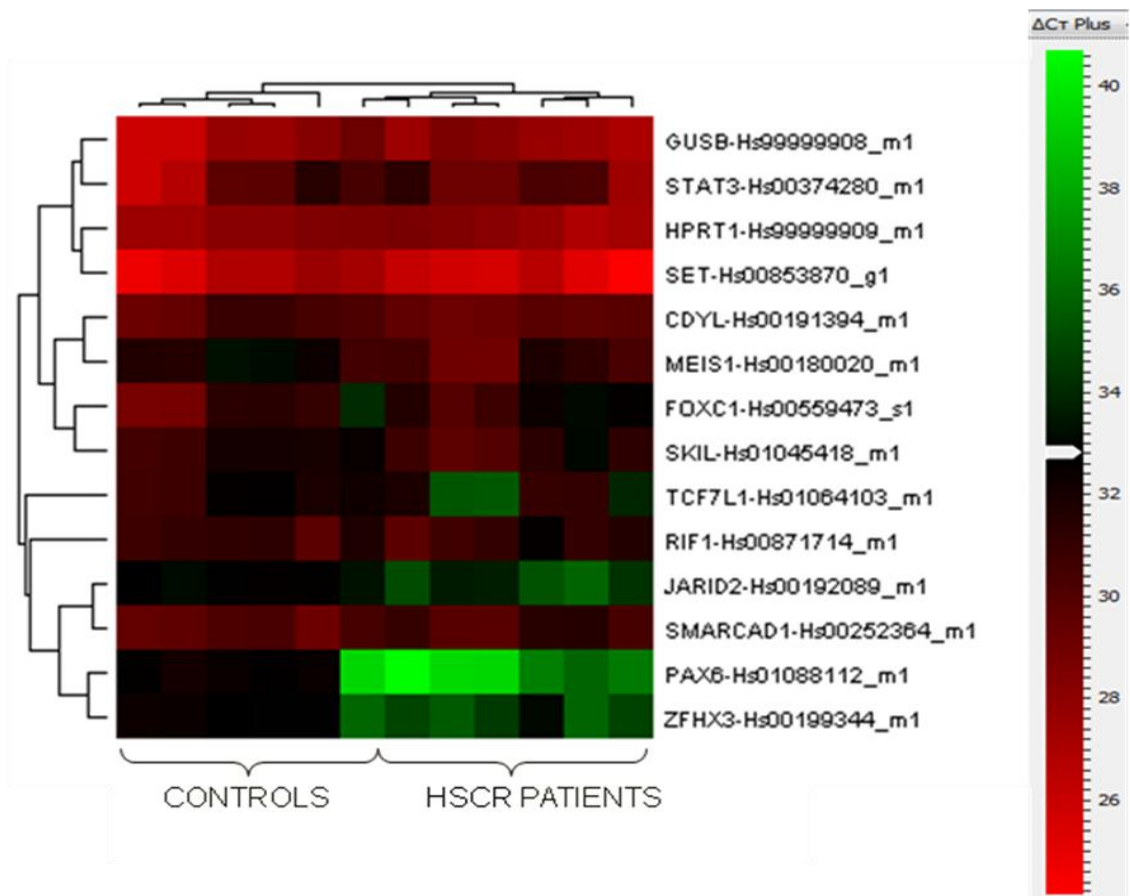

**Figure S1. Graphical representation of Transcription Factors expression in human NLBs from controls and HSCR patients.**

The Heat map was generated using DataAssist v3.0 software (Life Technologies) and it represents the messenger RNA expression levels of 14 transcription factors in NLBs from six controls and six HSCR patients. The expression level is set as the CT values from each sample for each assay. Genes were hierarchically clustered by Pearson correlation coefficient using average linkage. The color scale, representing  $\Delta C_t$ , is shown on the right side. Ct, cycle threshold; HSCR, Hirschsprung disease; NLBs, neurosphere-like bodies

**Figure S2**

| (AC)m(AG)n<br>Repeats | Allele count (%) |              |
|-----------------------|------------------|--------------|
|                       | CONTROL (n=298)  | HSCR (n=392) |
| 23                    | 0                | 1 (0,255%)   |
| 24                    | 4 (1,34%)        | 3 (0,765%)   |
| 25                    | 17 (5,074%)      | 25 (6,377%)  |
| 26                    | 168 (56,37%)     | 176 (44,89%) |
| 27                    | 35 (11,74%)      | 58 (14,795%) |
| 28                    | 32 (10,73%)      | 45 (11,479%) |
| 29                    | 14 (4,69%)       | 45 (11,479%) |
| 30                    | 14 (4,69%)       | 24 (6,122%)  |
| 31                    | 11(3,69%)        | 9 (2,295%)   |
| 32                    | 2 (0,67%)        | 1 (0,255%)   |
| 33                    | 1(0,33%)         | 1 (0,255%)   |
| 34                    |                  | 3 (0,765%)   |
| 35                    |                  | 1(0,255%)    |

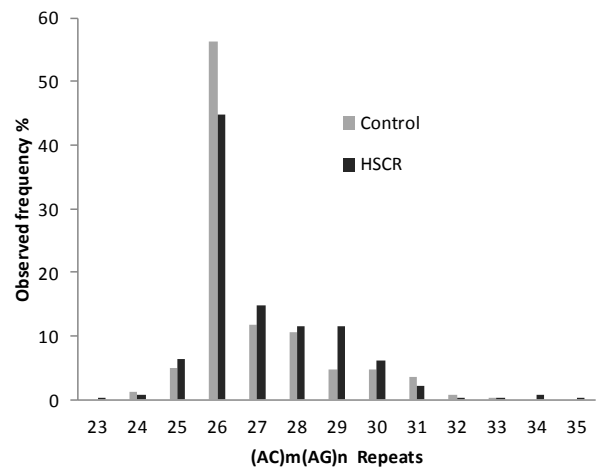

**Figure S2:** Allelic frequencies of *PAX6* P1 promoter dinucleotide repeats in HSCR patients and control subjects

Figure S3

Fragment 1

```
Mouse -----CCCCGGTT
Human CCCTCTTTTCTTATCATTGACATTTAAACTCTGGGGCAGGTCCTCGCGTAGAACGGCGGCT
                                     *  ***  *

Mouse GTCAGATCTGCTACTTCCC-----CCCCGAGAAGCGGCTTT
Human GTCAGATCTGCCACTTCCTTGATATTTAAATTTTGGGGTAGGTTTCTGCCGAGCGGCGGT
*****          *****                               ** * . ***** *

Mouse GAGAAGTGTGGGAACCAGCGCCACCAGACTCACCTGACACCCACCCCTCGGCTCACAGGT
Human GAGAAGTGTGGGAACCAGCGCGCTGCCAGGCTCACCTGCCTCCCCGCCCTCCGCTCCCAGGT
*****          **** . **** .***** .*:****.***** ****.*****

Mouse AACCGCTTTGATTCTAGCC-AGACTCACCCCAAGAGTAGCGGGCGCCCTCTCCGACGTGC
Human AACCGCCCGGGCTCCGGCCCCGGCCCGGCTCGGGGCCCGGGGGCTCTCCGCTGCCAGC
*****   * . ** .*** .*. * * * .*. . ***** *** *** * . : **

Mouse AACCTGTGTGTTTCAGGTCATAGAAACCCTCCCCGAGTGGCCCCGGCCTTGATTTTTTTTCT
Human GACTGCTGTCCCA---AATCAAAGCCCCGCCCAAGTGGCCCCGGGCTTGAT-----T
. **   ***   **   .**..**.* ** * .*****          * . : *   *
```

Fragment 2

```
Mouse -----TGCGGAGTCATTAGTGGGTTTCAAAAGCGAACC
Human TCAGAGCGAGCGGTGCATTTGCATGTTGCGGAGTCATTAGTGGGTTTCAAAAGGGAACC
                                     *****

Mouse TGGCTCGGCCTCATTTCCTGCTCTGGTTTTCAGGCGCAGGAGGAAGTGTGTTTCTGGAGGAT
Human TGGCTCGGCCTCATTTCCTGCTCTGGTTTTCAGGCGCAGGAGGAAGTGTGTTTCTGGAGGAT
*****

Mouse GATGACAGAGGTCAGGCTTCGCTAATGGGCCAGTGAGGAGCGGTGCAGGCCAGGCCGGC
Human GATGACAGAGGTCAGGCTTCGCTAATGGGCCAGTGAGGAGCGGTGCAGGCCAGGCCGGC
*****

Mouse GCCGGCACACACATTAAACACACTTGAGCCATCACCAATCAGCATAGGTGTGCTGGCTG
Human GCCGGCA-----
*****
```

Figure S3. Two regions of the *Pax6* sequence were targets of Dnmt3B methylation in mouse. The fragments shown in the figure correspond to regions in mouse with a high homology degree in humans and they also encompass predicted CpG islands (green).

**Table S1.** Transcription Factors expression normalized with the endogenous control

| <b>GENE NAME</b> | <b><math>\Delta</math>CT CONTROL</b> | <b><math>\Delta</math>CT HSCR</b> |
|------------------|--------------------------------------|-----------------------------------|
| CDYL             | 7,6                                  | 7,1                               |
| FOXC1            | 8,2                                  | 9,6                               |
| GUSB             | 5                                    | 5,3                               |
| HPRT1            | 5,7                                  | 5,5                               |
| JARID2           | 10,6                                 | 12                                |
| MEIS1            | 9,4                                  | 7,8                               |
| PAX6             | 11,8                                 | 15                                |
| RIF1             | 8,4                                  | 8,8                               |
| SET              | 3,8                                  | 3,2                               |
| SKIL             | 8,7                                  | 8,6                               |
| SMARCAD1         | 8                                    | 8                                 |
| STAT3            | 7                                    | 6,5                               |
| TCF7L1           | 9,4                                  | 10                                |
| ZFHX3            | 11                                   | 12,7                              |

**Table S2.** Transcription Factors Ct values in Control and HSCR NLBs

|          | <b>Ct Controls</b> | <b>Ct HSCR Patients</b> |
|----------|--------------------|-------------------------|
| CDYL     | 29                 | 32                      |
| FOXC1    | 30                 | 34                      |
| GUSB     | 26                 | 30                      |
| HPRT1    | 27                 | 30                      |
| JARID2   | 31                 | 37                      |
| MEIS1    | 31                 | 32                      |
| PAX6     | 30                 | 39                      |
| RIF1     | 30                 | 33                      |
| SET      | 25                 | 29                      |
| SKIL     | 30                 | 33                      |
| SMARCAD1 | 30                 | 33                      |
| STAT3    | 28                 | 31                      |
| TCF7L1   | 31                 | 35                      |
| ZFH3     | 31                 | 37                      |

**Table S3** : Identified *PAX6* variants in HSCR patients

| Nucleotide Change | Amino Acid Change | Reference   |
|-------------------|-------------------|-------------|
| c.-6-176C>T       |                   | rs6058885   |
| c.142+117G>A      |                   | -           |
| c.142+79G>A       |                   | rs181671547 |
| c.142+36C>A       |                   | -           |
| c.432+75G>A       |                   | -           |
| c.432+76T>A       |                   | -           |
| c.654+54A>G       |                   | rs4911108   |
| c.654+30T>C       |                   | rs73258152  |
| c.654+111G>A      |                   | rs79368590  |
| c.654+129A>G      |                   | rs6057645   |
| c.922-123G>A      |                   | rs1474738   |
| c.922-55C>A       |                   | -           |
| c.922-57G>T       |                   | -           |
| c.922-8C>T        |                   | rs200508870 |
| c.1066-113G>A     |                   | -           |
| c.1066-135G>T     |                   | -           |
| c.1066+653G>A     |                   | rs993419    |
| c.1066-55G>T      |                   | -           |
| c.1252+13T>G      |                   | rs910085    |
| c.1252-70G>T      |                   | -           |
| c.1252-59G>C      |                   | -           |
| c.1297+30C>T      |                   | rs875041    |
| c.1377+126C>T     |                   | rs6058890   |
| c.1377+60C>T      |                   | rs192769774 |
| c.1378-113C>A     |                   | rs6057648   |
| c.1572T>C         | Cys524Cys         | rs6058891   |
| c.1759-5C>G       |                   | rs1997797   |
| c.1759+122C>A     |                   | -           |
| c.1872C>T         | Tyr624Tyr         | -           |
| c.1881C>T         | Asp627Asp         | rs17123657  |

**Table S4.** P300 expression in HSCR and Control NLBs

|               | Ct average HSCR | Ct average control |
|---------------|-----------------|--------------------|
| P300          | 32,4            | 25,0               |
| Actin         | 23,3            | 15,2               |
|               | Ctp300-Ct Actin | Ctp300-Ct Actin    |
| Normalization | 9,1             | 9,8                |
| Fold Change   | 1,6             |                    |

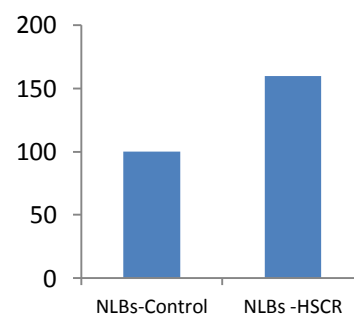

P300 Primers sequence used for the expression study:

LEFT PRIMER (5'-3'): GGCTCCAGGACAGTCAAAGA

RIGHT PRIMER(5'-3') : TCCATGGGGCTCTTCAAT



**Table S5:** Genes included in the “TaqMan® Human Transcriptional Regulatory Network in Embryonic Stem Cell Array Plate” (Life Technologies, USA).

|       |       |        |        |         |          |
|-------|-------|--------|--------|---------|----------|
| 18S   | GAPDH | HPRT1  | GUSB   | CALB1   | CDX2     |
| CDYL  | EOMES | ESX1   | FOXC1  | FOXD3   | GATA4    |
| GATA6 | GBX2  | GJD2   | GRIN1  | GSX2    | HAND1    |
| HESX1 | HNF4A | HOXB1  | ISL1   | JARID2  | LHX5     |
| MEIS1 | MYF5  | MYST3  | NANOG  | NEUROD1 | NEUROG1  |
| ORC3L | OTX1  | PAX6   | POU5F1 | REST    | RFX4     |
| RIF1  | SALL1 | SET    | SIX3   | SKIL    | SMARCAD1 |
| SOX2  | STAT3 | TCF7L1 | TRIM24 | ZFHX3   | ZIC3     |

**Table S6:** Primers used for *PAX6* P1 promoter fragment amplification in ChiP-PCR performed in NLBs from HSCR patient and control using P300 specific antibody.

| Forward (5'-3')      | Reverse (5'-3')      | Size (bp) |
|----------------------|----------------------|-----------|
| CACGCTGACATACCGACATC | AGGGGAGATAAGAGGGGAGG | 151       |

**Table S7:** Primers used for *Pax6* fragments amplification in ChiP-PCR performed in NLBs from mice using Dnmt3b specific antibody.

| Fragment | Forward (5'-3')         | Reverse (5'-3')        | Size (bp) |
|----------|-------------------------|------------------------|-----------|
| 1        | CCCGGTTGTCAGATCTGCTA    | ATCCGCAGCAACTCCTCTAC   | 271       |
| 2        | TGCGGAGTGATTAGTGGGTT    | CGGCTGGAGAGTGAGAGATA   | 255       |
| 3        | TGCATATAATTGAACCTGGGACA | TCGAAGACACACTCTACCTTTT | 157       |
| 4        | GGTGCTGGACAATGAAAACG    | CTTGGCTTACTCCCTCCGAT   | 202       |
